# Supplementary material
Source: PubMed Central journal article supplement (PMC4782769)
Supplement: NIHMS756059-supplement-Technical_Appendix.pdf [file NIHMS756059-supplement-Technical_Appendix.pdf]

# PEPFAR Funding Associated With An Increase In Employment Among Males in Ten Sub-Saharan African Countries

Zachary Wagner, Jeremy Barofsky, Neeraj Sood

## Technical Appendix

### Table of Contents

|                                                                                                                                                                                                                             |           |
|-----------------------------------------------------------------------------------------------------------------------------------------------------------------------------------------------------------------------------|-----------|
| <b>Part 1: Regression Specifications</b> .....                                                                                                                                                                              | <b>3</b>  |
| <b>Exhibit 3 Regression Specification:</b> .....                                                                                                                                                                            | <b>3</b>  |
| <b>Heterogeneity by Baseline HIV Prevalence Regression Specification:</b> .....                                                                                                                                             | <b>4</b>  |
| <b>Cumulative PEPFAR Funding Regression Specification:</b> .....                                                                                                                                                            | <b>5</b>  |
| <b>Part 2: Appendix Exhibits</b> .....                                                                                                                                                                                      | <b>6</b>  |
| <b>Exhibit A1.</b> DHS Surveys Included .....                                                                                                                                                                               | <b>6</b>  |
| <b>Exhibit A2.</b> DHS Surveys Included With HIV Testing Data .....                                                                                                                                                         | <b>7</b>  |
| <b>Exhibit A3.</b> Change in HIV Prevalence from Pre-PEPFAR to Post-PEPFAR, By Age .....                                                                                                                                    | <b>8</b>  |
| <b>Exhibit A4:</b> The Impact of PEPFAR on Employment in Last 12 Months (Only countries with two pre-periods where parallel trends are verified) .....                                                                      | <b>9</b>  |
| <b>Exhibit A5.</b> Differential Effect of PEPFAR on Employment by Baseline HIV Prevalence (Males Only) .....                                                                                                                | <b>10</b> |
| <b>Exhibit A6.</b> Association between cumulative PEPFAR per capita funding and employment (controlling for per capita HIV funding from the Global Fund for AIDS, Tuberculosis, and Malaria as categorical variables) ..... | <b>11</b> |
| <b>Exhibit A7:</b> Differential Effect of PEPFAR on Employment by Baseline HIV Prevalence (Males Only) .....                                                                                                                | <b>12</b> |
| <b>Exhibit A8.</b> Differential Effect of PEPFAR on Employment by Baseline HIV Mortality Per 100,000 (Males Only) .....                                                                                                     | <b>13</b> |
| <b>Exhibit A9:</b> Association between change in male labor force participation by PEPFAR focus nation and cumulative per capita PEPFAR funding .....                                                                       | <b>14</b> |
| <b>Exhibit A10.</b> Impact Of Removing Each Country Individually On Estimate Of PEPFAR Of Employment In The Last 12 Months (All Ages Combined) .....                                                                        | <b>15</b> |
| <b>Exhibit A11:</b> Change in male employment by country .....                                                                                                                                                              | <b>16</b> |
| <b>Exhibit A12.</b> The Impact of PEPFAR on Employment Status (Full regression results from Exhibit 3 in the main paper) .....                                                                                              | <b>17</b> |
| <b>Exhibit A13.</b> Association between PEPFAR Initiation and HIV Related Mortality .....                                                                                                                                   | <b>18</b> |
| <b>Table A14.</b> The Impact of PEPFAR on Employment Status for Males, By Occupation Type .....                                                                                                                             | <b>19</b> |
| <b>Table A15.</b> The Impact of PEPFAR on Employment Status for Females, By Occupation Type .....                                                                                                                           | <b>20</b> |
| <b>Table A16.</b> The Impact of PEPFAR on Employment Status, By Urban/Rural Residency .....                                                                                                                                 | <b>21</b> |

|                                                                                                                 |           |
|-----------------------------------------------------------------------------------------------------------------|-----------|
| <b>Exhibit A17.</b> The Impact of PEPFAR on Employment using a Probit Specification (Probit Coefficients) ..... | <b>22</b> |
| <b>Exhibit A18.</b> The Impact of PEPFAR on Employment using a Probit Specification (Marginal Effects) .....    | <b>23</b> |
| <b>Part 3. Plausibility of estimated effect on employment</b> .....                                             | <b>24</b> |
| <b>Table A3.1.</b> PEPFAR Cumulative Funding as a Percent of 2003 GDP .....                                     | <b>25</b> |
| <b>References</b> .....                                                                                         | <b>26</b> |

## Part 1: Regression Specifications

### Exhibit 3 Regression Specification:

To formally estimate the impact of PEPFAR on employment outcomes, we estimate the following linear probability model

$$(1) \quad Y_{ict} = \delta + \sigma PEPFARxPost_{ict} + \gamma_t \sum_{t=1999}^{2012} Year + \beta_c \sum_{c=2}^{21} Country_c + \varepsilon_{ict}$$

where  $Y$  is an employment outcome for individual  $i$  in country  $c$  at time  $t$ ,  $\delta$  is an intercept,  $PEPFAR$  represents whether country  $c$  was a PEPFAR focus country,  $Post$  represents whether the time period is pre- or post-2004, and therefore  $PEPFARxPost$  is an interaction term that is set to one if both the country is a PEPFAR country and the year is post-2004.  $Year$  is a dummy variable for each year and country is a dummy variable for each country, which represent time invariant year and country specific characteristics, respectively. Standard errors are clustered at the country level and all regressions are weighted by each country's contribution to the total population of the 21 nations (10 focus and 11 non-focus PEPFAR) under study. These nations constitute about 70% of sub-Saharan Africa's total population in 2003. The coefficient of interest is  $\sigma$ , which represents the difference-in-differences estimate of the PEPFAR program.

We estimate equation 1 for different age groups (15-24, 25-34, 35-44, 45-54). As described in the text, if prevention effects dominate we would expect PEPFAR to have larger effects at younger ages since this is when most new HIV incidence occurs. If the improved health effects of ART dominate this will have a greater impact on people at later stages of the illness who are generally older. Therefore, a larger effect at older ages is indicative of improved health and increased ability to work. On the other hand, a decrease in employment at older ages may be suggestive of two effects. First, this could indicate that the increase in life expectancy caused by ART saturated the labor market. Second, this could indicate that ART may keep people alive, but in a less productive state, therefore reducing the average ability to work at the population level. The full regression results for this model can be seen in Exhibit A12.

### **Heterogeneity by Baseline HIV Prevalence Regression Specification:**

To further isolate for the effect of PEPFAR on employment, we investigate how PEPFAR affected countries with higher baseline HIV prevalence differently than countries with a lower baseline prevalence. We would expect, if the employment changes we observe are driven by PEPFAR, that countries with a higher burden of HIV would benefit more from PEPFAR. To test this hypothesis, we also employ a triple-difference estimation strategy that uses variation in PEPFAR focus versus control countries, timing in PEPFAR initiation, and HIV prevalence before PEPFAR's initiation. That is, we estimate PEPFAR's effect on employment by comparing differences over PEPFAR status (focus versus non-focus), time (pre versus post PEPFAR initiation), and HIV prevalence in 2003 before PEPFAR. If the employment effects we observed above are indeed driven by HIV related interventions, we would expect differentially larger effects in nations with higher baseline HIV prevalence. Therefore the specification includes the triple interaction of PEPFAR status, baseline HIV prevalence, and post-program initiation. Also included in this specification are the two pairs of double interactions vary over time within country, and year and country fixed effects. We therefore estimate the following linear probability model.

$$(2) \quad Y_{ict} = \delta + \sigma PEPFARxPost_{ict} + \pi PEPFARxPostxPrev_{ict} + \theta PrevXPost + \gamma_t \sum_{t=1999}^{2012} Year_t + \beta_c \sum_{c=2}^{21} Country_c + \varepsilon_{ict}$$

where  $PEPARxPostxPrev$  is the triple difference term of interest, and  $\pi$  is the main estimate of interest. If  $\pi$  is positive it indicates that countries with a higher baseline prevalence experienced a greater employment benefit from PEPFAR. It is important to note that most triple difference models include each component of the triple interaction, as well as each double interaction independently. In our case, we do not include the  $PEPFAR$  variable,  $Prev$  variable, or the  $PEPFARxPrev$  interaction independently because these terms do not vary within country over time, so this variation is captured with country fixed effects. Moreover, we do not include the  $Post$  variable since the variation in this term is captured with the year fixed effects. The full regression results for this model are presented in Exhibit A5

### **Cumulative PEPFAR Funding Regression Specification:**

In addition to exploring PEPFAR's effects using a binary measure of a nation's PEPFAR designation, we also investigate the association between cumulative PEPFAR funding per capita and employment. Specifically, we use variation in per capita cumulative PEPFAR outlays by focus nation between fiscal years 2004 to 2011 (where 2003 population between ages 15 and 64 is used to calculate per capita values) to identify how PEPFAR spending affects work. To estimate this effect we employ the following specification:

$$(3) \quad Y_{ict} = \delta + \sigma CumFunding_{ct} + \gamma_t \sum_{t=1999}^{2012} Year_t + \beta_c \sum_{c=2}^{21} Country_c + \theta LowGlobalFund_{ct} + \alpha MedGlobalFund_{ct} + \Phi HighGlobalFund_{ct} + \varepsilon_{ict}$$

where  $CumFunding_{ct}$  represents cumulative per capita funding by nation and post PEPFAR initiation and is mechanically set to zero pre-PEPFAR. Country-level cumulative per capita funding from 2002 to May 2013 for HIV from the Global Fund for AIDS, Tuberculosis, and Malaria is controlled for by separating nations into funding terciles and adding binary indicators for low, medium, and high per capita Global Fund funding to equation (4) (Duran and Silverman, 2013). Our coefficient of interest  $\sigma$  represents the effect of an additional hundred per capita PEPFAR dollars on employment. All other variables are defined as above. The full regression results for this model are presented in Exhibit A6.

## Part 2: Appendix Exhibits

**Exhibit A1. DHS Surveys Included**

| Focus Countries            | Pre-Years <sup>1</sup> | Post-Years <sup>2</sup> |
|----------------------------|------------------------|-------------------------|
| Ethiopia                   | 2000                   | 2005, 2011              |
| Mozambique <sup>#</sup>    | 1997*, 2003            | 2011                    |
| Nigeria <sup>#</sup>       | 1999, 2003             | 2008                    |
| Uganda <sup>#</sup>        | 1995*, 2000-01         | 2006, 2011              |
| Zambia <sup>#</sup>        | 1996*, 2001-02         | 2007                    |
| Cote d'Ivoire <sup>#</sup> | 1994*, 1998            | 2011                    |
| Kenya <sup>#</sup>         | 1998, 2003             | 2008-09                 |
| Namibia                    | 2000                   | 2006-07                 |
| Rwanda                     | 2000                   | 2005, 2007, 2010        |
| Tanzania <sup>#</sup>      | 1996*, 1999            | 2004-05, 2010           |
| Control Countries          | Pre                    | Post                    |
| Benin <sup>#</sup>         | 1996*, 2001            | 2006                    |
| Burkina Faso <sup>#</sup>  | 1998, 2003             | 2010                    |
| Cameroon <sup>#</sup>      | 1991*, 1998            | 2004, 2011              |
| Gabon                      | 2000                   | 2012                    |
| Ghana <sup>#</sup>         | 1998, 2003             | 2008                    |
| Guinea                     | 1999                   | 2005                    |
| Madagascar <sup>#</sup>    | 1997*, 2003-04         | 2008-09                 |
| Malawi                     | 2000                   | 2004, 2010              |
| Mali <sup>#</sup>          | 1995-96*, 2001         | 2006                    |
| Niger                      | 1998                   | 2006                    |
| Zimbabwe                   | 1999                   | 2005-06, 2010-11        |

<sup>1</sup>Pre-years indicate years that are pre-2004, the year PEPFAR was implemented

<sup>2</sup> Post-years indicate years that are post-2004, the year PEPFAR was implemented.

<sup>#</sup>Country used in analysis testing parallel trends

\*Year used only for parallel trends analysis

**Exhibit A2. DHS Surveys Included With HIV Testing Data**

| Focus Countries | Pre-Years <sup>1</sup> | Post-Years <sup>2</sup> |
|-----------------|------------------------|-------------------------|
| Ethiopia        | 2005                   | 2011                    |
| Cote d'Ivoire   | 2005                   | 2011                    |
| Kenya           | 2003                   | 2008-09                 |
| Rwanda          | 2005                   | 2010                    |
| Tanzania        | 2003                   | 2007, 2011              |

  

| Control Countries | Pre  | Post |
|-------------------|------|------|
| Burkina Faso      | 2003 | 2010 |
| Cameroon          | 2004 | 2011 |
| Malawi            | 2004 | 2010 |
| Zimbabwe          | 2005 | 2010 |

<sup>1</sup>Pre-years indicate years that are pre-2004, the year PEPFAR was implemented. To increase sample size, for countries with a survey year in 2004 or 2005 AND in 2010 or 2011, 2004-5 were interpreted as pre-years.

<sup>2</sup> Post-years indicate the second round of surveys after PEPFAR was implemented.

**Exhibit A3.** Change in HIV Prevalence from Pre-PEPFAR to Post-PEPFAR, By Age

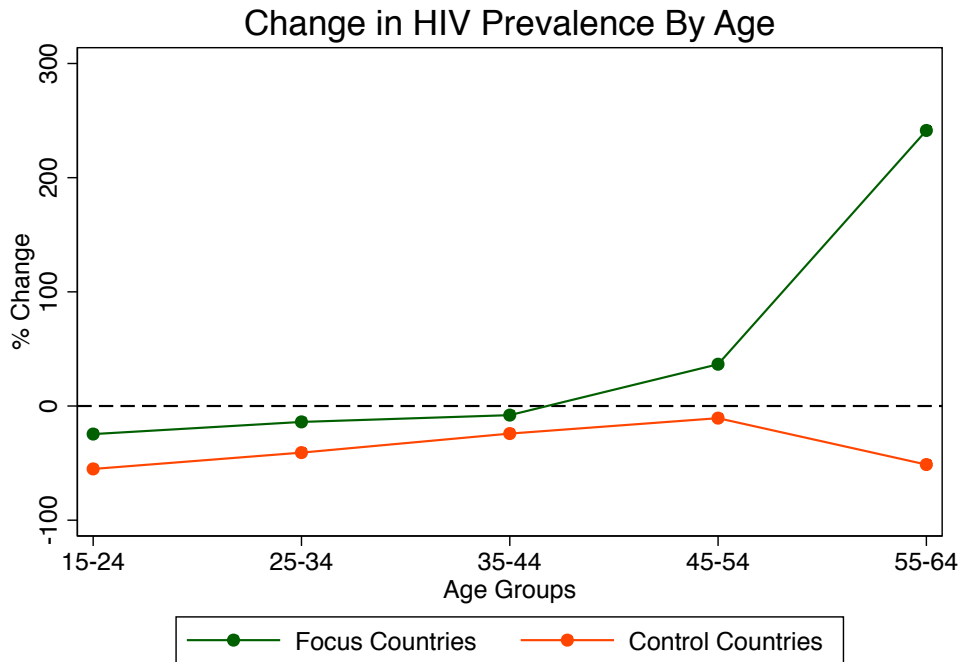

This figure measures the percent change in HIV prevalence from pre-PEPFAR to post-PEPFAR for each 10-year age group. We measure prevalence using DHS data, which includes HIV test results from a subset of households, countries, and years used in our analysis (See Appendix Exhibit A2 for country list). A larger percent increase at older ages for focus countries would suggest that PEPFAR contributed to extended life for HIV positive people. We see no evidence of a larger percent decrease in prevalence at younger ages which suggests that PEPFAR was not associated with reduced HIV incidence. Ages older than 49 only include males. Due to limitations in survey waves, we classify 2004 and 2005 as pre-periods to include more countries in the analysis.



**Exhibit A4: The Impact of PEPFAR on Employment in Last 12 Months**  
(Only countries with two pre-periods where parallel trends are verified)

| Dependent Variable: Worked in Last 12 Months |                      |                     |                       |                     |                      |
|----------------------------------------------|----------------------|---------------------|-----------------------|---------------------|----------------------|
|                                              | (1)                  | (2)                 | (3)                   | (4)                 | (5)                  |
|                                              | All                  | 15-24               | 25-34                 | 35-44               | 45-54                |
| <b>Panel B: Males</b>                        |                      |                     |                       |                     |                      |
| PEPFAR X Post                                | 0.0837**<br>(0.0339) | 0.124<br>(0.0749)   | 0.0459***<br>(0.0148) | 0.0119<br>(0.0109)  | 0.0354**<br>(0.0146) |
| Observations                                 | 134304               | 49349               | 36005                 | 26280               | 17239                |
| <b>Panel C: Females</b>                      |                      |                     |                       |                     |                      |
| PEPFAR X Post                                | -0.0336<br>(0.0391)  | -0.0411<br>(0.0428) | -0.0357<br>(0.0377)   | -0.0298<br>(0.0331) | -0.0223<br>(0.0330)  |
| Observations                                 | 338037               | 135946              | 105529                | 69360               | 25591                |

Standard errors clustered at the country level in parentheses

\* p<.10 \*\* p<.05 \*\*\* p<.01

Includes Country and Year Fixed Effect

Weighted By Population

**Exhibit A5. Differential Effect of PEPFAR on Employment by Baseline HIV  
Prevalence (Males Only)**

|                                 | (1)                | (2)                | (3)                | (4)                  | (5)                  |
|---------------------------------|--------------------|--------------------|--------------------|----------------------|----------------------|
|                                 | All                | 15-24              | 25-34              | 35-44                | 45-54                |
| PEPFAR X Post                   | 0.0269<br>(0.0519) | -0.0155<br>(0.105) | 0.0437<br>(0.0298) | -0.0269<br>(0.0193)  | -0.0393*<br>(0.0224) |
| PEPFAR X Post X 2003 Prevalence | 1.244<br>(0.734)   | 2.949**<br>(1.409) | 0.184<br>(0.444)   | 0.944***<br>(0.276)  | 1.555***<br>(0.324)  |
| Post X 2003 Prevalence          | -0.612<br>(0.530)  | -1.127<br>(0.944)  | -0.300<br>(0.257)  | -0.514***<br>(0.178) | -0.621***<br>(0.174) |
| Year FE                         | Yes                | Yes                | Yes                | Yes                  | Yes                  |
| Country FE                      | Yes                | Yes                | Yes                | Yes                  | Yes                  |
| Observations                    | 228395             | 86787              | 61147              | 43779                | 28796                |
| R-squared                       | 0.030              | 0.074              | 0.025              | 0.037                | 0.044                |

Standard errors clustered at the country level in parentheses

\* p<.10 \*\* p<.05 \*\*\* p<.01

Includes Country and Year Fixed Effects

Weighted By Population

**Exhibit A6.** Association between cumulative PEPFAR per capita funding and employment (controlling for per capita HIV funding from the Global Fund for AIDS, Tuberculosis, and Malaria as categorical variables)

|                         | (1)      | (2)       | (3)      | (4)     | (5)      |
|-------------------------|----------|-----------|----------|---------|----------|
|                         | All      | 15-24     | 25-34    | 35-44   | 45-54    |
| <b>Panel A: Males</b>   |          |           |          |         |          |
| Cumulative              |          |           |          |         |          |
| PEPFAR                  | 0.0914** | 0.1867*** | 0.0248   | 0.0208  | 0.0517*  |
| Funding                 | (0.036)  | (0.065)   | (0.022)  | (0.022) | (0.0003) |
| Low Global              | -0.1095  | 0.1724    | -0.0026  | 0.0694  | 0.0517   |
| Fund X Post             | (0.081)  | (0.140)   | (0.043)  | (0.044) | (0.066)  |
| Medium Global           | -0.0834  | 0.2283    | 0.0120   | 0.0609  | 0.0398   |
| Fund X Post             | (0.095)  | (0.133)   | (0.053)  | (0.052) | (0.074)  |
| High Global             | -0.3056* | -0.2526*  | -0.0622  | -0.0053 | -0.0273  |
| Fund X Post             | (0.154)  | (0.124)   | (0.086)  | (0.034) | (0.049)  |
| Observations            | 228395   | 86787     | 61147    | 43779   | 28796    |
| R-squared               | 0.849    | 0.672     | 0.94     | 0.978   | 0.971    |
| <b>Panel B: Females</b> |          |           |          |         |          |
| PEPFAR X Post           | 0.015    | 0.0057    | 0.0293   | 0.0117  | 0.0274   |
|                         | (0.042)  | (0.047)   | (0.035)  | (0.037) | (0.032)  |
| Low Global              | -0.049   | -0.126    | -0.118   | -0.047  | 0.0132   |
| Fund X Post             | (0.055)  | (0.098)   | (0.094)  | (0.094) | (0.049)  |
| Medium Global           | -0.1224* | -0.2093*  | -0.2084* | -0.1155 | -0.10018 |
| Fund X Post             | (0.071)  | (0.12)    | (0.119)  | (0.117) | (0.069)  |
| High Global             | -0.161*  | -0.197*   | -0.186*  | -0.078  | -0.0265  |
| Fund X Post             | (0.082)  | (0.102)   | (0.093)  | (0.094) | (0.094)  |
| Year FE                 | Yes      | Yes       | Yes      | Yes     | Yes      |
| Observations            | 553317   | 226158    | 171552   | 112533  | 41463    |
| R-squared               | 0.634    | 0.494     | 0.714    | 0.775   | 0.789    |

Standard errors clustered at the country level in parentheses

\* p<.10 \*\* p<.05 \*\*\* p<.01

Includes Country and Year Fixed Effects, per capita funding in \$100's

Weighted By Population

Sources: Cumulative HIV Global Fund funding 2002-2013 data come from

Duran and Silverman (2013) and population data from the World Bank.

**Exhibit A7: Differential Effect of PEPFAR on Employment by Baseline HIV Prevalence (Males Only)**

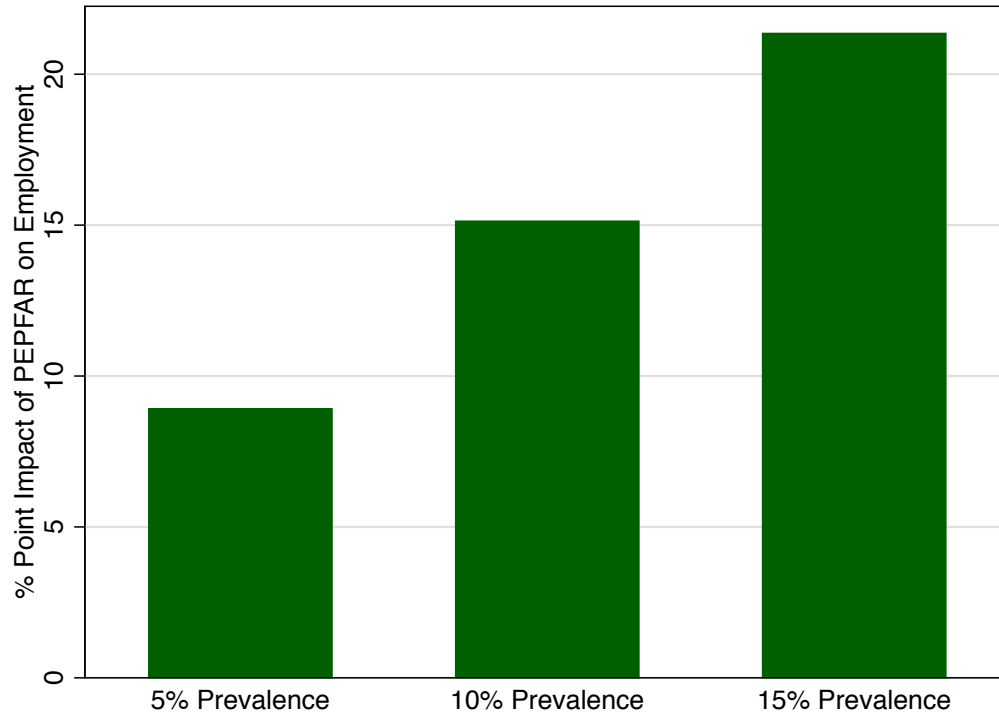

**Notes:** Estimates are from recycled predictions based off of regressions from equation 2. Each bar represents the predicted effect of PEPFAR on employment from regression estimates. Low, medium, and high funding represent the 25<sup>th</sup>, 50<sup>th</sup>, and 75<sup>th</sup> percentile of cumulative PEPFAR funding.

**Exhibit A8.** Differential Effect of PEPFAR on Employment by Baseline HIV Mortality Per 100,000 (Males Only)

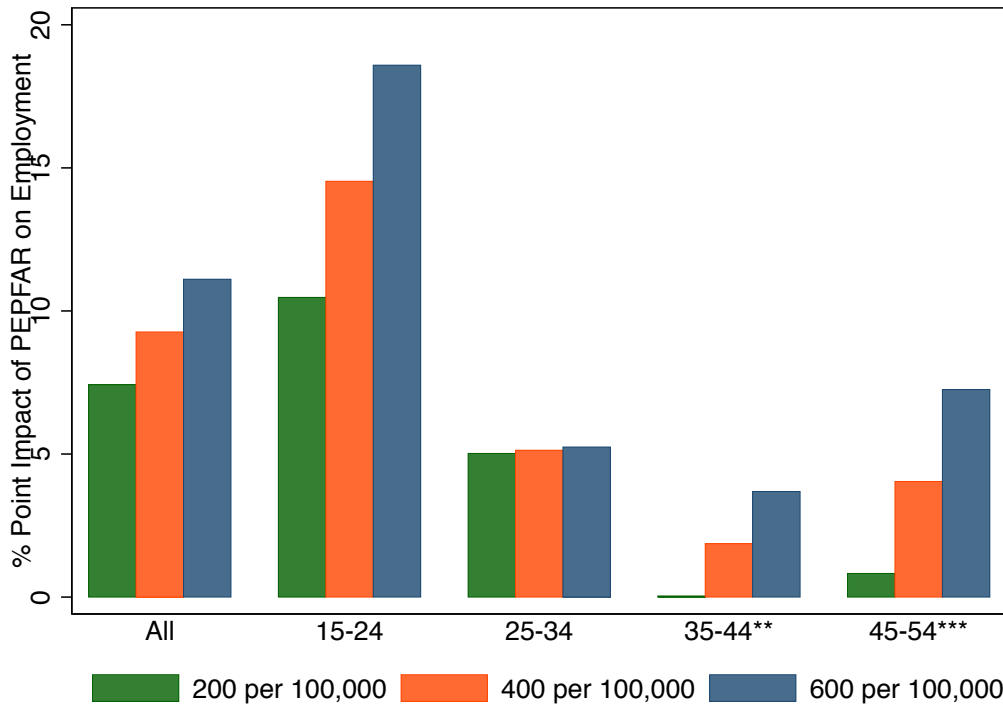

**Notes:** Estimates are from recycled predictions based off of regressions interacting baseline (2003) mortality rate with the main PEPFAR X POST difference-in-difference term. Estimating equation is identical to equation 2 but with mortality rate instead of prevalence. Each bar represents the predicted impact on employment from regression estimates. Regressions were run separately for each age group. 2003 mortality estimates were retrieved from the UNAIDS/AIDSinfo database.

\*\* p<.05, \*\*\* p<.01

**Exhibit A9:** Association between change in male labor force participation by PEPFAR focus nation and cumulative per capita PEPFAR funding

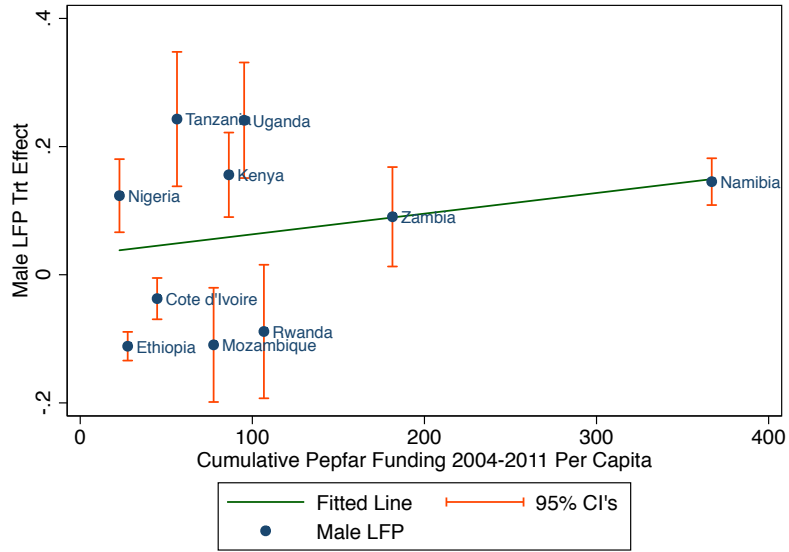

**Exhibit A10.** Impact Of Removing Each Country Individually On Estimate Of PEPFAR Of Employment In The Last 12 Months (All Ages Combined)

| Country Removed | Males     | Females   |
|-----------------|-----------|-----------|
| Benin           | 0.0991*** | -0.0590*  |
| Burkina Faso    | 0.111***  | -0.0501   |
| Cameroon        | 0.114***  | -0.0431   |
| Cote d'Ivoire   | 0.101***  | -0.0629*  |
| Ethiopia        | 0.0913**  | -0.0181   |
| Gabon           | 0.0994*** | -0.0557   |
| Ghana           | 0.0825**  | -0.0749** |
| Guinea          | 0.104***  | -0.0473   |
| Kenya           | 0.0910**  | -0.0487   |
| Madagascar      | 0.101**   | -0.0484   |
| Malawi          | 0.120***  | -0.0317   |
| Mali            | 0.0896**  | -0.0675** |
| Mozambique      | 0.0943**  | -0.0426   |
| Namibia         | 0.0986*** | -0.0570   |
| Niger           | 0.0987*** | -0.0597*  |
| Nigeria         | 0.114***  | -0.0769** |
| Rwanda          | 0.0948**  | -0.0604*  |
| Tanzania        | 0.118***  | -0.0519   |
| Uganda          | 0.0820**  | -0.0857** |
| Zambia          | 0.0994*** | -0.0557   |
| Zimbabwe        | 0.0782**  | -0.0551   |

**Exhibit A11: Change in male employment by country**

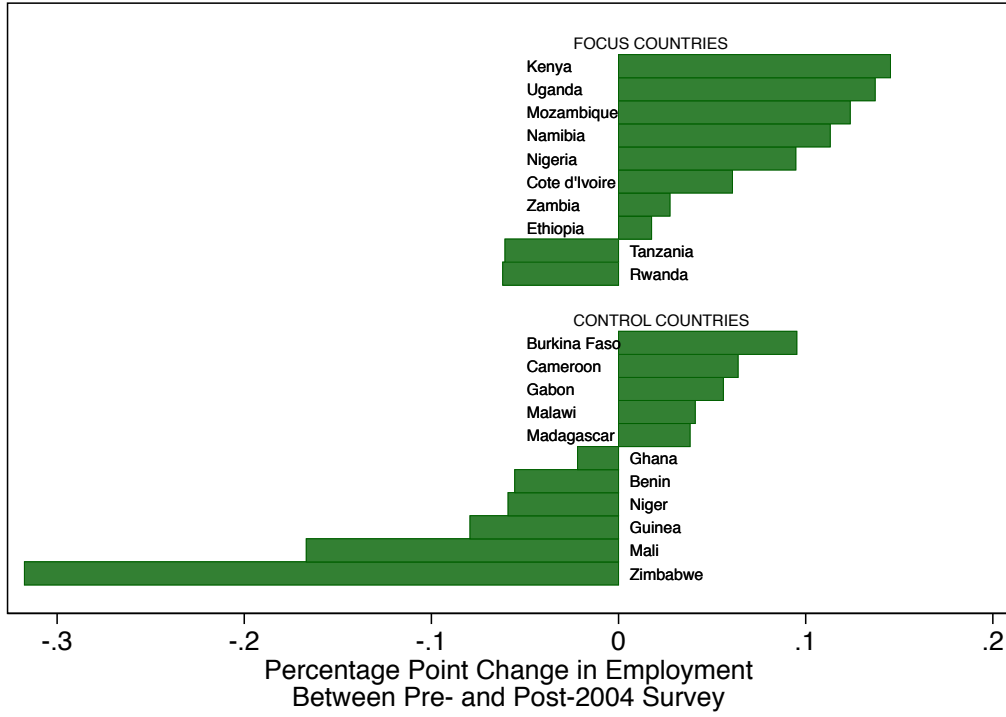



## Exhibit A12. The Impact of PEPFAR on Employment Status

(Full regression results from Exhibit 3 in the main paper)

|                         | (1)                   | (2)                  | (3)                   | (4)                  | (5)                   |
|-------------------------|-----------------------|----------------------|-----------------------|----------------------|-----------------------|
|                         | All                   | 15-24                | 25-34                 | 35-44                | 45-54                 |
| <b>Panel A: All</b>     |                       |                      |                       |                      |                       |
| PEPFAR X Post           | 0.0272<br>(0.0278)    | 0.0423<br>(0.0395)   | -0.00373<br>(0.0227)  | -0.00591<br>(0.0192) | 0.0233<br>(0.0212)    |
| Country FE              | Yes                   | Yes                  | Yes                   | Yes                  | Yes                   |
| Year FE                 | Yes                   | Yes                  | Yes                   | Yes                  | Yes                   |
| Observations            | 781712                | 312945               | 232699                | 156312               | 70259                 |
| R-squared               | 0.096                 | 0.081                | 0.128                 | 0.149                | 0.141                 |
| <b>Panel B: Males</b>   |                       |                      |                       |                      |                       |
| PEPFAR X Post           | 0.0994***<br>(0.0339) | 0.165**<br>(0.0718)  | 0.0545***<br>(0.0148) | 0.0259*<br>(0.0126)  | 0.0465***<br>(0.0147) |
| Country FE              | Yes                   | Yes                  | Yes                   | Yes                  | Yes                   |
| Year FE                 | Yes                   | Yes                  | Yes                   | Yes                  | Yes                   |
| Observations            | 228395                | 86787                | 61147                 | 43779                | 28796                 |
| R-squared               | 0.029                 | 0.073                | 0.025                 | 0.036                | 0.042                 |
| <b>Panel C: Females</b> |                       |                      |                       |                      |                       |
| PEPFAR X Post           | -0.0557<br>(0.0335)   | -0.0650*<br>(0.0345) | -0.0647*<br>(0.0343)  | -0.0579*<br>(0.0306) | -0.0512<br>(0.0332)   |
| Country FE              | Yes                   | Yes                  | Yes                   | Yes                  | Yes                   |
| Year FE                 | Yes                   | Yes                  | Yes                   | Yes                  | Yes                   |
| Observations            | 553317                | 226158               | 171552                | 112533               | 41463                 |
| R-squared               | 0.061                 | 0.060                | 0.071                 | 0.090                | 0.102                 |

Standard errors clustered at the country level in parentheses

\* p<.10 \*\* p<.05 \*\*\* p<.01

Includes Country and Year Fixed Effects

Weighted By Population

**Exhibit A13.** Association between PEPFAR Initiation and HIV Related Mortality

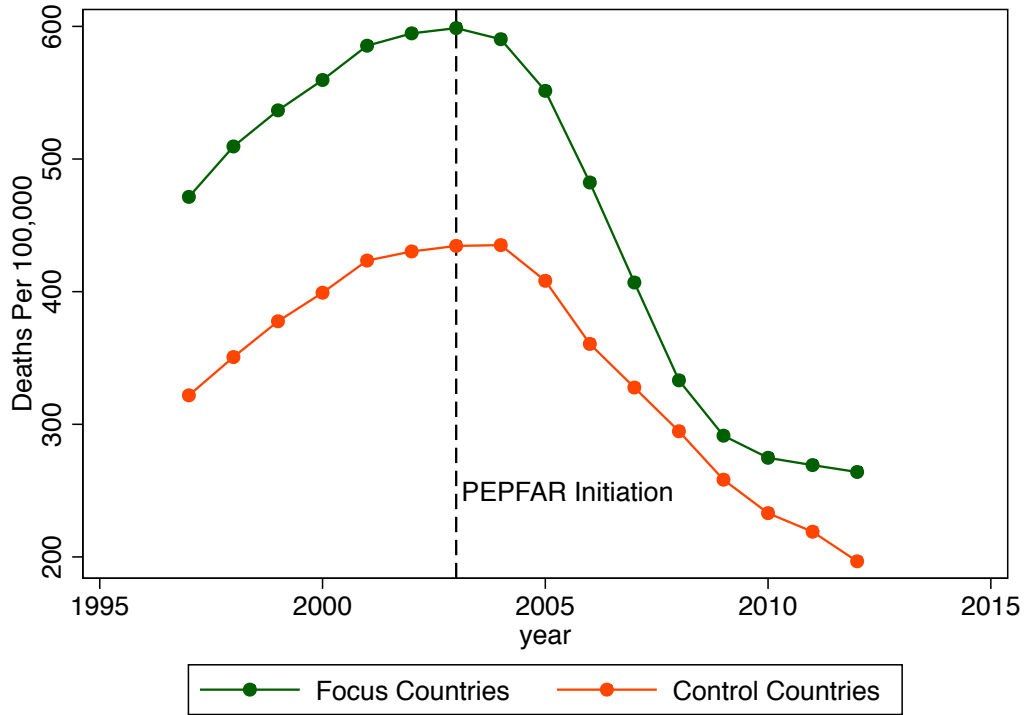

Mortality estimates were retrieved from the UNAIDS/AIDSinfo database.

**Table A14.** The Impact of PEPFAR on Employment Status for Males,  
By Occupation Type

|               | (1)                                    | (2)                 | (3)                  | (4)                 | (5)                  |
|---------------|----------------------------------------|---------------------|----------------------|---------------------|----------------------|
|               | All                                    | 15-24               | 25-34                | 35-44               | 45-54                |
|               | <b>Manual Labor</b>                    |                     |                      |                     |                      |
| PEPFAR X Post | 0.0585<br>(0.0824)                     | 0.0267<br>(0.0835)  | 0.0681<br>(0.0565)   | 0.0210<br>(0.0476)  | 0.114*<br>(0.0557)   |
| Observations  | 77337                                  | 43614               | 16917                | 9630                | 5726                 |
|               | <b>Agriculture</b>                     |                     |                      |                     |                      |
| PEPFAR X Post | 0.151**<br>(0.0638)                    | 0.155*<br>(0.0826)  | 0.126**<br>(0.0444)  | 0.0574<br>(0.0354)  | 0.0880**<br>(0.0385) |
| Observations  | 137072                                 | 60859               | 30557                | 23203               | 17057                |
|               | <b>Domestic Services</b>               |                     |                      |                     |                      |
| PEPFAR X Post | 0.0151<br>(0.0229)                     | 0.00616<br>(0.0122) | 0.0370<br>(0.0643)   | -0.0345<br>(0.140)  | 0.106<br>(0.0940)    |
| Observations  | 42044                                  | 32849               | 4731                 | 2094                | 1725                 |
|               | <b>Sales and Professional Services</b> |                     |                      |                     |                      |
| PEPFAR X Post | 0.145**<br>(0.0520)                    | 0.113*<br>(0.0555)  | 0.107***<br>(0.0276) | 0.0598*<br>(0.0289) | 0.121***<br>(0.0391) |
| Observations  | 84325                                  | 41521               | 19814                | 13013               | 7946                 |

Standard errors clustered at the country level in parentheses

\* p<.10 \*\* p<.05 \*\*\* p<.01

Includes Country and Year Fixed Effects

Weighted By Population

**Table A15.** The Impact of PEPFAR on Employment Status for Females,  
By Occupation Type

|                                        | (1)<br>All           | (2)<br>15-24         | (3)<br>25-34         | (4)<br>35-44         | (5)<br>45-49        |
|----------------------------------------|----------------------|----------------------|----------------------|----------------------|---------------------|
| <b>Manual Labor</b>                    |                      |                      |                      |                      |                     |
| PEPFAR X Post                          | -0.0670<br>(0.0501)  | -0.0678<br>(0.0420)  | -0.0858<br>(0.0526)  | -0.0886<br>(0.0559)  | -0.0506<br>(0.0609) |
| Observations                           | 231017               | 123356               | 60913                | 33404                | 11852               |
| <b>Agriculture</b>                     |                      |                      |                      |                      |                     |
| PEPFAR X Post                          | -0.0473<br>(0.0616)  | -0.0445<br>(0.0552)  | -0.0620<br>(0.0686)  | -0.0574<br>(0.0625)  | -0.0613<br>(0.0612) |
| Observations                           | 374142               | 169167               | 106522               | 69810                | 27116               |
| <b>Domestic Services</b>               |                      |                      |                      |                      |                     |
| PEPFAR X Post                          | 0.00577<br>(0.0185)  | 0.00705<br>(0.0164)  | 0.000674<br>(0.0260) | -0.00681<br>(0.0270) | -0.0123<br>(0.0225) |
| Observations                           | 197747               | 112745               | 48531                | 25768                | 9215                |
| <b>Sales and Professional Services</b> |                      |                      |                      |                      |                     |
| PEPFAR X Post                          | -0.00494<br>(0.0302) | -0.00353<br>(0.0230) | -0.0289<br>(0.0419)  | -0.0444<br>(0.0373)  | 0.00975<br>(0.0354) |
| Observations                           | 316268               | 144942               | 93740                | 56513                | 19516               |

Standard errors clustered at the country level in parentheses

\* p<.10 \*\* p<.05 \*\*\* p<.01

Includes Country and Year Fixed Effects

Weighted By Population

**Table A16.** The Impact of PEPFAR on Employment Status, By Urban/Rural Residency

| <b>Rural</b>  |                      |                      |                       |                      |                        |
|---------------|----------------------|----------------------|-----------------------|----------------------|------------------------|
| <b>Male</b>   |                      |                      |                       |                      |                        |
|               | (1)                  | (2)                  | (3)                   | (4)                  | (5)                    |
|               | All                  | 15-24                | 25-34                 | 35-44                | 45-54                  |
| Pepfar X Post | 0.112***<br>(0.0353) | 0.205**<br>(0.0734)  | 0.0686***<br>(0.0158) | 0.0334**<br>(0.0147) | 0.0493**<br>(0.0197)   |
| Observations  | 149225               | 55438                | 38919                 | 29268                | 20047                  |
| <b>Female</b> |                      |                      |                       |                      |                        |
| Pepfar X Post | -0.0672*<br>(0.0387) | -0.0698*<br>(0.0385) | -0.0792*<br>(0.0389)  | -0.0627<br>(0.0380)  | -0.0603<br>(0.0398)    |
| Observations  | 367235               | 143679               | 114063                | 78497                | 29906                  |
| <b>Urban</b>  |                      |                      |                       |                      |                        |
| <b>Male</b>   |                      |                      |                       |                      |                        |
| Pepfar X Post | 0.0688*<br>(0.0353)  | 0.0844<br>(0.0734)   | 0.0257*<br>(0.0134)   | 0.0104<br>(0.00932)  | 0.0357***<br>(0.00849) |
| Observations  | 79170                | 31349                | 22228                 | 14511                | 8749                   |
| <b>Female</b> |                      |                      |                       |                      |                        |
| Pepfar X Post | -0.0287<br>(0.0243)  | -0.0485*<br>(0.0269) | -0.0265<br>(0.0206)   | -0.0338<br>(0.0211)  | -0.0216<br>(0.0242)    |
| Observations  | 186082               | 82479                | 57489                 | 34036                | 11557                  |

Standard errors clustered at the country level in parentheses

\* p<.10 \*\* p<.05 \*\*\* p<.01

Includes Country and Year Fixed Effects

Weighted By Population

**Exhibit A17.** The Impact of PEPFAR on Employment using a Probit Specification (Probit Coefficients)

| Dependent Variable: Worked in Last 12 Months |           |           |           |           |            |
|----------------------------------------------|-----------|-----------|-----------|-----------|------------|
|                                              | (1)       | (2)       | (3)       | (4)       | (5)        |
|                                              | All       | 15-24     | 25-34     | 35-44     | 45-54      |
| <b>Panel A: Males</b>                        |           |           |           |           |            |
| PEPFAR X Post                                | 0.33684** | 0.42770** | 0.32430** | 0.2821*   | 0.45719*** |
|                                              | (0.1419)  | (0.2)     | (0.1293)  | (0.1698)  | (0.1529)   |
| Observations                                 | 228395    | 86787     | 61147     | 43779     | 28796      |
| <b>Panel B: Females</b>                      |           |           |           |           |            |
| PEPFAR X Post                                | -0.15486  | -0.16198* | -0.2124*  | -0.23939* | -0.19436   |
|                                              | (0.0993)  | (0.0915)  | (0.128)   | (0.1261)  | (0.1372)   |
| Observations                                 | 553317    | 226158    | 171552    | 112533    | 41463      |

**Notes:** Standard errors clustered at the country level in parentheses,

\* p<.10 \*\* p<.05 \*\*\*p<.01, Includes Country and Year Fixed Effects.  
Weighted by population.

Age groups correspond to age at time of the survey

**Exhibit A18.** The Impact of PEPFAR on Employment using a Probit Specification (Marginal Effects)

| Dependent Variable: Worked in Last 12 Months |          |         |         |          |         |
|----------------------------------------------|----------|---------|---------|----------|---------|
|                                              | (1)      | (2)     | (3)     | (4)      | (5)     |
|                                              | All      | 15-24   | 25-34   | 35-44    | 45-54   |
| <b>Panel A: Males</b>                        |          |         |         |          |         |
| Marginal Effects                             | 10.4     | 16.8    | 7.7     | 1.5      | 2.8     |
|                                              | (.00647) | (.0123) | (.0129) | (.00508) | (.0072) |
| <b>Panel B: Females</b>                      |          |         |         |          |         |
| Marginal Effects                             | -6.2     | -5.7    | -8.2    | -8.6     | -6.96   |
|                                              | (.0042)  | (.0047) | (.0083) | (.011)   | (.0164) |

**Notes:** Change in probability of work in the last 12 months is calculated using the CLARIFY software package which simulates parameters from 100 runs of the probit model using Monte Carlo simulation (1). Standard errors in parentheses. Includes Country and Year Fixed Effects. Weighted by population. Age groups correspond to age at time of the survey. To calculate marginal effects in Exhibit we follow Ai and Norton (2003)(2), who explain that the interaction term effect in nonlinear models is equal to the cross derivative of the expectation of the outcome and not the commonly calculated marginal effect of the interaction term. That is, Ai and Norton show that the interaction effect in nonlinear models is conditional on the values of other independent variables, unlike linear models nor does the interaction term’s sign necessarily determine the sign of the interaction effect. We employ the CLARIFY software in Stata to correctly estimate the magnitude of the interaction effect with a probit model. This is executed by simulate parameters from each estimation of our main specification with a probit functional form to explore the change in probability of work, while setting country and year to 0 and therefore obtaining the change in probability of work for an individual resident in a PEPFAR focus nation after the program’s introduction, while controlling for individual country and year fixed effects.

### Part 3. Plausibility of estimated effect on employment

The 13% increase in male employment is rather large considering that the HIV prevalence rate was around 7.8% in focus nations at baseline. However, when we take into account the fact that PEPFAR funding was a stimulus that constituted 6% of the combined GDP of PEPFAR countries used in our analysis, this result is plausible. Below we conduct a series of calculations to show that the expected effect on employment based on estimates from prior research is well within our estimated confidence interval. We first calculate the expected health effects to the HIV positive population as:

$$\Delta Employment_{ART} = \%Benefit * \%HIVpos * \Delta pr(employment)$$

Where  $\Delta Employment_{ART}$  is the expected population level employment change as a result of PEPFAR induced ART initiation,  $\%Benefit$  is the share of the HIV positive population that received care through PEPFAR,  $\%HIVpos$  is the share of the population in PEPFAR countries that are HIV positive in 2003, and  $\Delta pr(employment)$  is the percent change in the probability of being employed after treatment initiation. To estimate the share of the HIV positive population that benefits from PEPFAR we use data from PEPFAR's website (<http://data.pepfar.net/>) on how many people received care divided by the number of HIV positive people in 2003 across PEPFAR countries, which are from the World Bank's World Development Indicators Data. We estimate that 40% of the HIV positive population received care through PEPFAR and 7.8% of the population is HIV positive, which means that 3.12% of the total population across all PEPFAR countries received care through PEPFAR. For the change in employment probability after PEPFAR initiation, we use estimates from Thirumurthy et al. (2008)(3), who estimate a 20% increase in employment. This gives a .624% increase in population level employment as a result of PEPFAR's health effects on the HIV positive.

To estimate the stimulus effect on population level employment, we use the following equation:

$$\Delta Employment_{stimulus} = \%GDP * Multiplier * OkunRatio$$

Where  $\Delta Employment_{stimulus}$  is the change in the population level employment due to the PEPFAR stimulus,  $\%GDP$  is the share of the combined GDP among PEPFAR countries that is



made up by cumulative PEPFAR funding, *Multiplier* is the multiplier effect of the stimulus, and *OkunRatio* is the relationship between the change in GDP and the change in employment identified in Okun's Law. Using data from the Center for Global development and the World Bank Development Indicators, we estimate that PEPFAR constituted roughly 6% of total GDP across the 10 focus countries (See Table A3.1).

| <b>Table A3.1. PEPFAR Cumulative Funding as a Percent of 2003 GDP</b>                                                                                                                                                                                                                      |                                 |                  |                                       |
|--------------------------------------------------------------------------------------------------------------------------------------------------------------------------------------------------------------------------------------------------------------------------------------------|---------------------------------|------------------|---------------------------------------|
|                                                                                                                                                                                                                                                                                            | Outlays FY 2004-2011 (in 1000s) | GDP 2003         | Outlays FY 2004-2011 as % of 2003 GDP |
| Nigeria                                                                                                                                                                                                                                                                                    | 1625354                         | 81267700         | 2.00                                  |
| Cote d'Ivoire                                                                                                                                                                                                                                                                              | 414395                          | 15877203         | 2.61                                  |
| Namibia                                                                                                                                                                                                                                                                                    | 411059                          | 6304585          | 6.52                                  |
| Tanzania                                                                                                                                                                                                                                                                                   | 1083495                         | 12215276         | 8.87                                  |
| Kenya                                                                                                                                                                                                                                                                                      | 1583180                         | 16842340         | 9.40                                  |
| Ethiopia                                                                                                                                                                                                                                                                                   | 1001547                         | 9584181          | 10.45                                 |
| Mozambique                                                                                                                                                                                                                                                                                 | 807885                          | 5563946          | 14.52                                 |
| Uganda                                                                                                                                                                                                                                                                                     | 1228358                         | 7935129          | 15.48                                 |
| Zambia                                                                                                                                                                                                                                                                                     | 1006492                         | 6464303          | 15.57                                 |
| Rwanda                                                                                                                                                                                                                                                                                     | 507417                          | 2213861          | 22.92                                 |
| <b>Total</b>                                                                                                                                                                                                                                                                               | <b>9669182</b>                  | <b>162054666</b> | <b>5.96</b>                           |
| Source: Author's calculations, The Emergency Plan for AIDS Relief, Summary financial status as of September 30, 2011. <a href="http://www.pepfar.gov/documents/organization/184791.pdf">http://www.pepfar.gov/documents/organization/184791.pdf</a> and World Bank Development Indicators. |                                 |                  |                                       |

We use a multiplier effect of 1.6 based off of Ilzetzi et al. (2013) and a 1 to 1.75 Okun's Law ratio between employment growth and GDP based off of Ola-David and Oluwatobi (2012),(4, 5). This means that a 1% increase in GDP results in a .57% increase in employment. This gives an expected stimulus effect of PEPFAR of  $.06 * 1.6 * .57 = 5.5\%$ . Adding the effect of the stimulus with the effect of ART initiation gives a total expected effect of roughly 6.1%, which is well within our confidence interval (3.7%-22.1%).

## References

1. Tomz M, Wittenberg J, King G. CLARIFY: Software for interpreting and presenting statistical results. *Journal of Statistical Software*. 2003;8(1):1-30.
2. Ai C, Norton EC. Interaction terms in logit and probit models. *Economics letters*. 2003;80(1):123-9.
3. Thirumurthy H, Zivin JG, Goldstein M. The Economic Impact of AIDS Treatment. *Journal of Human Resources*. 2008;43(3):511-52.
4. Ola-David O, Oluwatobi S. Output and Unemployment Relationship: How Applicable is the Okun's Law to Nigeria. Available at SSRN. 2012.
5. Ilzetzki E, Mendoza EG, Végh CA. How big (small?) are fiscal multipliers? *Journal of Monetary Economics*. 2013;60(2):239-54.
